# Supplementary material for: Solvent effects on the nitrogen NMR chemical shifts in 1-methylazoles – a theoretical study
Source: Royal Society of Chemistry journal article supplement (doi:10.1039/c5nj01889g), 2015-01-01
Supplement: c5nj01889g1.pdf [file c5nj01889g1.pdf]

Electronic Supplementary Information

New Journal of Chemistry

**Solvent effects on the nitrogen NMR chemical shifts in 1-methylazoles – a theoretical study**

Agnieszka Brzyska, Piotr Borowski, Krzysztof Woliński





**Table 2SA The solvent effect on the bond lengths in 1-methyl-1,2,3,4-tetrazole (the atoms numbering see Figure 1S)**

| R [Å]                                     | gas        | c-hexane | dioxane | CCl <sub>4</sub> | C <sub>6</sub> H <sub>6</sub> | Et <sub>2</sub> O | CHCl <sub>3</sub> | CH <sub>2</sub> Cl <sub>2</sub> | (CH <sub>3</sub> ) <sub>2</sub> CO | EtOH    | MeOH    | DMSO    | H <sub>2</sub> O |
|-------------------------------------------|------------|----------|---------|------------------|-------------------------------|-------------------|-------------------|---------------------------------|------------------------------------|---------|---------|---------|------------------|
| N <sub>2</sub> N <sub>1</sub>             | 1.352<br>6 | 1.3390   | 1.3398  | 1.3387           | 1.3387                        | 1.3374            | 1.3372            | 1.3363                          | 1.3358                             | 1.3357  | 1.3356  | 1.3355  | 1.3353           |
| N <sub>3</sub> N <sub>2</sub>             | 1.288<br>1 | 1.2910   | 1.2908  | 1.2911           | 1.2912                        | 1.2920            | 1.2919            | 1.2925                          | 1.2928                             | 1.2929  | 1.2930  | 1.2929  | 1.2932           |
| N <sub>4</sub> N <sub>3</sub>             | 1.361<br>1 | 1.3592   | 1.3591  | 1.3590           | 1.3590                        | 1.3580            | 1.3581            | 1.3575                          | 1.3573                             | 1.3572  | 1.3571  | 1.3571  | 1.3569           |
| C <sub>5</sub> N <sub>1</sub>             | 1.346<br>8 | 1.3532   | 1.3524  | 1.3529           | 1.3529                        | 1.3515            | 1.3514            | 1.3506                          | 1.3501                             | 1.3500  | 1.3498  | 1.3499  | 1.3496           |
| C <sub>5</sub> N <sub>4</sub>             | 1.313<br>3 | 1.3148   | 1.3154  | 1.3152           | 1.3152                        | 1.3167            | 1.3168            | 1.3177                          | 1.3182                             | 1.3184  | 1.3186  | 1.3185  | 1.3188           |
| C <sub>6</sub> N <sub>1</sub>             | 1.454<br>9 | 1.4562   | 1.4567  | 1.4564           | 1.4564                        | 1.4580            | 1.4581            | 1.4590                          | 1.4597                             | 1.4598  | 1.4599  | 1.4599  | 1.4600           |
| H <sub>7</sub> C <sub>5</sub>             | 1.077<br>6 | 1.0773   | 1.0775  | 1.0773           | 1.0773                        | 1.0773            | 1.0773            | 1.0773                          | 1.0773                             | 1.0773  | 1.0773  | 1.0773  | 1.0774           |
| H <sub>8</sub> C <sub>6</sub>             | 1.090<br>9 | 1.0897   | 1.0909  | 1.0885           | 1.0885                        | 1.0881            | 1.0880            | 1.0878                          | 1.0876                             | 1.0876  | 1.0876  | 1.0876  | 1.0876           |
| H <sub>9</sub> C <sub>6</sub>             | 1.090<br>9 | 1.0886   | 1.0892  | 1.0897           | 1.0897                        | 1.0893            | 1.0894            | 1.0892                          | 1.0890                             | 1.0890  | 1.0890  | 1.0890  | 1.0889           |
| H <sub>10</sub> C <sub>6</sub>            | 1.087<br>7 | 1.0895   | 1.0880  | 1.0894           | 1.0894                        | 1.0892            | 1.0892            | 1.0890                          | 1.0889                             | 1.0889  | 1.0889  | 1.0889  | 1.0890           |
| <b>R<sup>gas</sup>-R<sup>medium</sup></b> |            |          |         |                  |                               |                   |                   |                                 |                                    |         |         |         |                  |
| N <sub>2</sub> N <sub>1</sub>             |            | 0.0136   | 0.0127  | 0.0138           | 0.0139                        | 0.0152            | 0.0154            | 0.0162                          | 0.0168                             | 0.0169  | 0.0170  | 0.0170  | 0.0173           |
| N <sub>3</sub> N <sub>2</sub>             |            | -0.0029  | -0.0028 | -0.0031          | -0.0031                       | -0.0039           | -0.0039           | -0.0044                         | -0.0047                            | -0.0048 | -0.0049 | -0.0049 | -0.0051          |
| N <sub>4</sub> N <sub>3</sub>             |            | 0.0019   | 0.0020  | 0.0021           | 0.0021                        | 0.0031            | 0.0030            | 0.0036                          | 0.0038                             | 0.0040  | 0.0040  | 0.0040  | 0.0042           |
| C <sub>5</sub> N <sub>1</sub>             |            | -0.0065  | -0.0056 | -0.0061          | -0.0061                       | -0.0047           | -0.0046           | -0.0038                         | -0.0034                            | -0.0032 | -0.0031 | -0.0031 | -0.0029          |
| C <sub>5</sub> N <sub>4</sub>             |            | -0.0016  | -0.0022 | -0.0019          | -0.0019                       | -0.0034           | -0.0035           | -0.0045                         | -0.0050                            | -0.0052 | -0.0053 | -0.0053 | -0.0055          |
| C <sub>6</sub> N <sub>1</sub>             |            | -0.0012  | -0.0018 | -0.0015          | -0.0015                       | -0.0030           | -0.0032           | -0.0041                         | -0.0047                            | -0.0048 | -0.0049 | -0.0050 | -0.0051          |
| H <sub>7</sub> C <sub>5</sub>             |            | 0.0002   | 0.0001  | 0.0003           | 0.0002                        | 0.0003            | 0.0003            | 0.0003                          | 0.0003                             | 0.0002  | 0.0002  | 0.0002  | 0.0002           |
| H <sub>8</sub> C <sub>6</sub>             |            | 0.0012   | 0.0000  | 0.0024           | 0.0025                        | 0.0028            | 0.0029            | 0.0031                          | 0.0033                             | 0.0033  | 0.0033  | 0.0034  | 0.0034           |
| H <sub>9</sub> C <sub>6</sub>             |            | 0.0024   | 0.0018  | 0.0012           | 0.0012                        | 0.0016            | 0.0015            | 0.0018                          | 0.0019                             | 0.0019  | 0.0019  | 0.0019  | 0.0020           |
| H <sub>10</sub> C <sub>6</sub>            |            | -0.0018  | -0.0003 | -0.0017          | -0.0017                       | -0.0015           | -0.0015           | -0.0014                         | -0.0012                            | -0.0012 | -0.0013 | -0.0012 | -0.0013          |

**Table 2SB The solvent effect on the bond angles in 1-methyl-1,2,3,4-tetrazole (the atoms numbering see Figure 1S)**

| $\alpha$ [°]                                   | gas    | c-hexane | dioxane | CCl <sub>4</sub> | C <sub>6</sub> H <sub>6</sub> | Et <sub>2</sub> O | CHCl <sub>3</sub> | CH <sub>2</sub> Cl <sub>2</sub> | (CH <sub>3</sub> ) <sub>2</sub> CO | EtOH   | MeOH   | DMSO   | H <sub>2</sub> O |
|------------------------------------------------|--------|----------|---------|------------------|-------------------------------|-------------------|-------------------|---------------------------------|------------------------------------|--------|--------|--------|------------------|
| N <sub>3</sub> N <sub>2</sub> N <sub>1</sub>   | 106.71 | 106.90   | 106.90  | 106.90           | 106.90                        | 106.91            | 106.91            | 106.92                          | 106.93                             | 106.93 | 106.93 | 106.93 | 106.93           |
| N <sub>4</sub> N <sub>3</sub> N <sub>2</sub>   | 111.11 | 111.04   | 111.02  | 111.03           | 111.03                        | 110.99            | 110.99            | 110.95                          | 110.94                             | 110.93 | 110.92 | 110.93 | 110.91           |
| N <sub>2</sub> N <sub>1</sub> C <sub>5</sub>   | 107.53 | 107.83   | 107.83  | 107.84           | 107.85                        | 107.93            | 107.94            | 107.99                          | 108.01                             | 108.03 | 108.03 | 108.03 | 108.05           |
| N <sub>1</sub> C <sub>5</sub> N <sub>4</sub>   | 109.13 | 108.70   | 108.69  | 108.69           | 108.69                        | 108.64            | 108.64            | 108.60                          | 108.58                             | 108.58 | 108.57 | 108.57 | 108.56           |
| C <sub>5</sub> N <sub>4</sub> N <sub>3</sub>   | 105.52 | 105.53   | 105.55  | 105.53           | 105.53                        | 105.54            | 105.53            | 105.54                          | 105.53                             | 105.54 | 105.54 | 105.53 | 105.54           |
| N <sub>2</sub> N <sub>1</sub> C <sub>6</sub>   | 121.27 | 122.04   | 122.08  | 122.06           | 122.05                        | 122.17            | 122.20            | 122.26                          | 122.32                             | 122.33 | 122.34 | 122.35 | 122.36           |
| C <sub>5</sub> N <sub>1</sub> C <sub>6</sub>   | 131.19 | 130.14   | 130.04  | 130.10           | 130.10                        | 129.90            | 129.87            | 129.75                          | 129.66                             | 129.64 | 129.62 | 129.62 | 129.59           |
| H <sub>7</sub> C <sub>5</sub> N <sub>1</sub>   | 124.49 | 124.71   | 124.77  | 124.71           | 124.71                        | 124.70            | 124.69            | 124.68                          | 124.66                             | 124.66 | 124.65 | 124.65 | 124.62           |
| H <sub>7</sub> C <sub>5</sub> N <sub>4</sub>   | 126.38 | 126.59   | 126.53  | 126.60           | 126.60                        | 126.66            | 126.67            | 126.72                          | 126.76                             | 126.76 | 126.78 | 126.77 | 126.82           |
| H <sub>8</sub> C <sub>6</sub> N <sub>1</sub>   | 110.42 | 109.49   | 110.24  | 108.98           | 108.97                        | 108.85            | 108.81            | 108.76                          | 108.70                             | 108.70 | 108.69 | 108.67 | 108.66           |
| H <sub>9</sub> C <sub>6</sub> N <sub>1</sub>   | 110.42 | 109.03   | 109.59  | 109.50           | 109.50                        | 109.35            | 109.39            | 109.30                          | 109.26                             | 109.25 | 109.22 | 109.24 | 109.16           |
| H <sub>8</sub> C <sub>6</sub> H <sub>9</sub>   | 109.83 | 109.67   | 109.90  | 109.68           | 109.68                        | 109.74            | 109.75            | 109.79                          | 109.81                             | 109.82 | 109.83 | 109.82 | 109.85           |
| H <sub>10</sub> C <sub>6</sub> N <sub>1</sub>  | 107.08 | 109.27   | 107.69  | 109.25           | 109.26                        | 109.22            | 109.18            | 109.15                          | 109.14                             | 109.11 | 109.11 | 109.13 | 109.13           |
| H <sub>8</sub> C <sub>6</sub> H <sub>10</sub>  | 109.52 | 109.72   | 109.69  | 109.67           | 109.67                        | 109.73            | 109.74            | 109.78                          | 109.80                             | 109.81 | 109.82 | 109.81 | 109.85           |
| H <sub>9</sub> C <sub>6</sub> H <sub>10</sub>  | 109.52 | 109.66   | 109.70  | 109.75           | 109.75                        | 109.92            | 109.95            | 110.04                          | 110.11                             | 110.12 | 110.14 | 110.15 | 110.17           |
| $\alpha^{\text{gas}} - \alpha^{\text{medium}}$ |        |          |         |                  |                               |                   |                   |                                 |                                    |        |        |        |                  |
| N <sub>3</sub> N <sub>2</sub> N <sub>1</sub>   |        | -0.19    | -0.19   | -0.19            | -0.19                         | -0.20             | -0.20             | -0.21                           | -0.22                              | -0.22  | -0.22  | -0.22  | -0.22            |
| N <sub>4</sub> N <sub>3</sub> N <sub>2</sub>   |        | 0.07     | 0.09    | 0.08             | 0.08                          | 0.12              | 0.12              | 0.16                            | 0.17                               | 0.18   | 0.19   | 0.18   | 0.20             |
| N <sub>2</sub> N <sub>1</sub> C <sub>5</sub>   |        | -0.29    | -0.30   | -0.31            | -0.31                         | -0.40             | -0.40             | -0.45                           | -0.48                              | -0.49  | -0.50  | -0.50  | -0.52            |
| N <sub>1</sub> C <sub>5</sub> N <sub>4</sub>   |        | 0.42     | 0.43    | 0.44             | 0.44                          | 0.49              | 0.49              | 0.53                            | 0.54                               | 0.55   | 0.56   | 0.55   | 0.57             |
| C <sub>5</sub> N <sub>4</sub> N <sub>3</sub>   |        | -0.01    | -0.04   | -0.01            | -0.02                         | -0.02             | -0.01             | -0.02                           | -0.02                              | -0.02  | -0.02  | -0.02  | -0.02            |
| N <sub>2</sub> N <sub>1</sub> C <sub>6</sub>   |        | -0.77    | -0.81   | -0.78            | -0.78                         | -0.90             | -0.92             | -0.99                           | -1.05                              | -1.06  | -1.07  | -1.08  | -1.09            |
| C <sub>5</sub> N <sub>1</sub> C <sub>6</sub>   |        | 1.06     | 1.16    | 1.10             | 1.10                          | 1.29              | 1.33              | 1.44                            | 1.53                               | 1.55   | 1.57   | 1.57   | 1.61             |
| H <sub>7</sub> C <sub>5</sub> N <sub>1</sub>   |        | -0.21    | -0.28   | -0.22            | -0.22                         | -0.21             | -0.20             | -0.19                           | -0.16                              | -0.17  | -0.16  | -0.16  | -0.13            |
| H <sub>7</sub> C <sub>5</sub> N <sub>4</sub>   |        | -0.21    | -0.15   | -0.22            | -0.22                         | -0.28             | -0.30             | -0.34                           | -0.38                              | -0.38  | -0.40  | -0.40  | -0.44            |
| H <sub>8</sub> C <sub>6</sub> N <sub>1</sub>   |        | 0.93     | 0.18    | 1.44             | 1.45                          | 1.57              | 1.61              | 1.66                            | 1.72                               | 1.72   | 1.73   | 1.75   | 1.76             |
| H <sub>9</sub> C <sub>6</sub> N <sub>1</sub>   |        | 1.39     | 0.83    | 0.92             | 0.92                          | 1.07              | 1.03              | 1.12                            | 1.16                               | 1.17   | 1.20   | 1.18   | 1.26             |
| H <sub>8</sub> C <sub>6</sub> H <sub>9</sub>   |        | 0.17     | -0.07   | 0.15             | 0.15                          | 0.09              | 0.08              | 0.04                            | 0.02                               | 0.01   | 0.00   | 0.01   | -0.02            |
| H <sub>10</sub> C <sub>6</sub> N <sub>1</sub>  |        | -2.19    | -0.60   | -2.17            | -2.17                         | -2.14             | -2.09             | -2.07                           | -2.05                              | -2.03  | -2.03  | -2.04  | -2.04            |
| H <sub>8</sub> C <sub>6</sub> H <sub>10</sub>  |        | -0.20    | -0.17   | -0.15            | -0.15                         | -0.21             | -0.22             | -0.26                           | -0.28                              | -0.29  | -0.30  | -0.29  | -0.33            |
| H <sub>9</sub> C <sub>6</sub> H <sub>10</sub>  |        | -0.14    | -0.18   | -0.23            | -0.23                         | -0.40             | -0.43             | -0.52                           | -0.59                              | -0.60  | -0.62  | -0.63  | -0.65            |

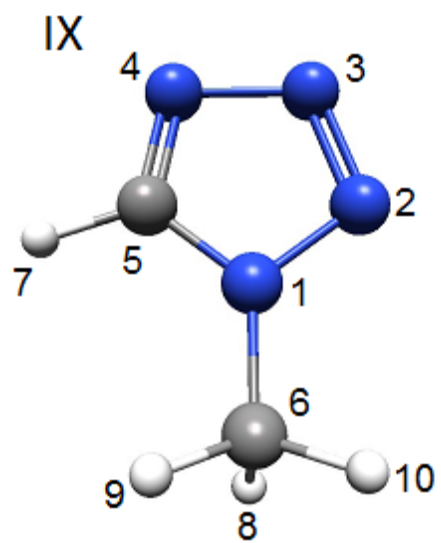

Figure 1S. The atoms numbering in 1-methyl-1,2,3,4-tetrazole.
